# Supplementary material
Source: PubMed Central journal article supplement (PMC6136138)

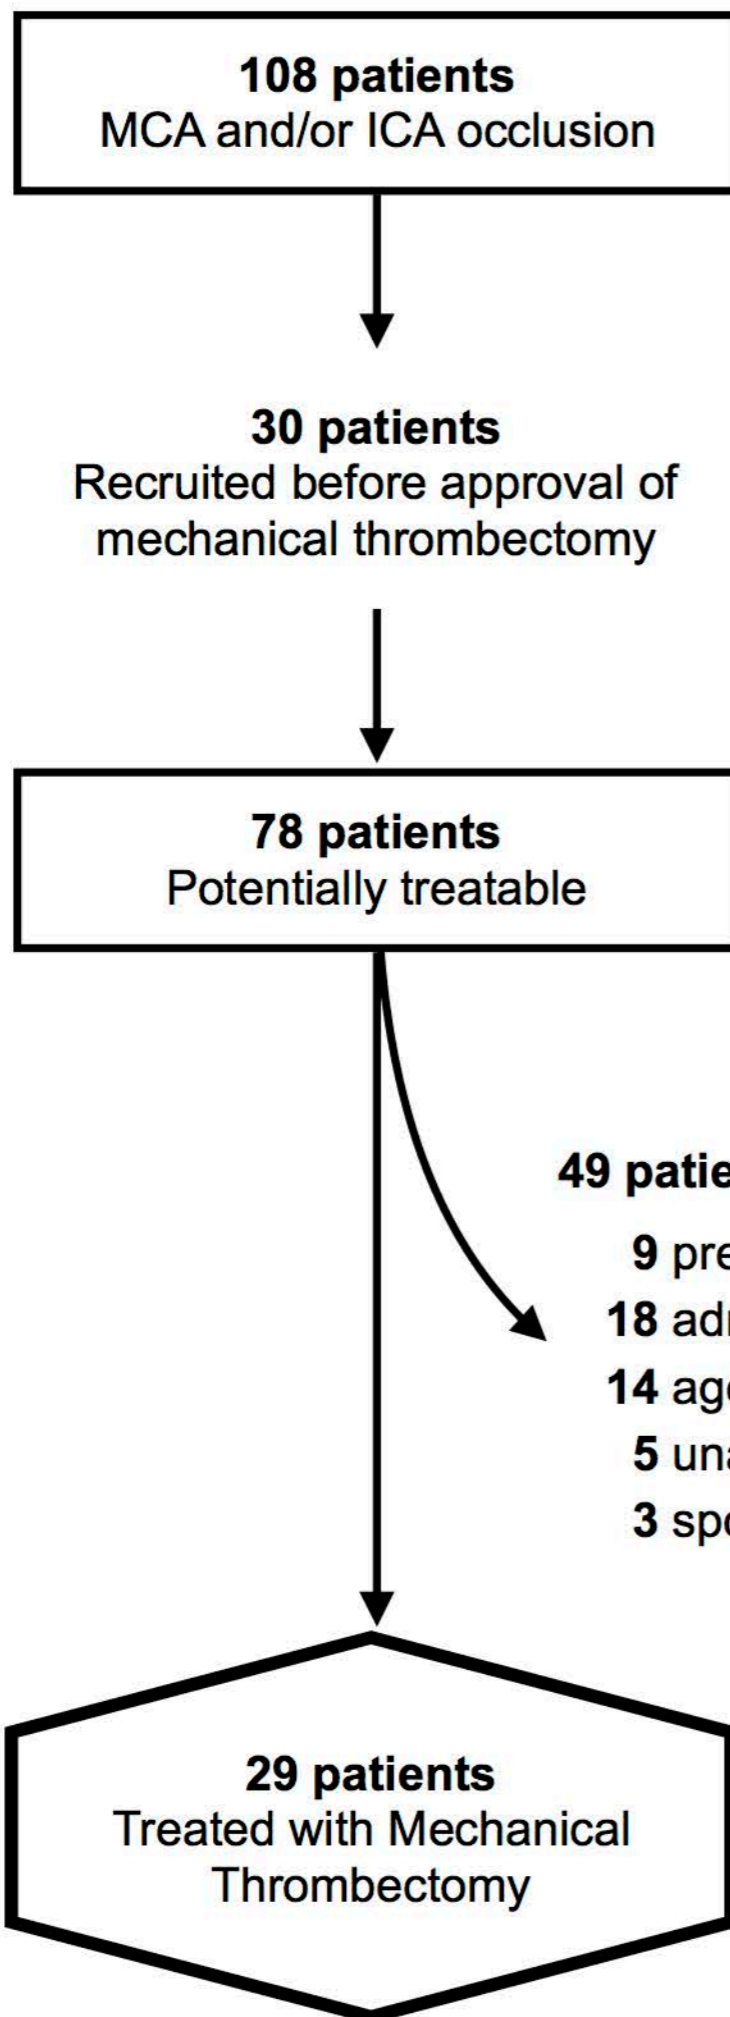

Supplement: Supplemental_material1.pdf [file Supplemental_material1.pdf]
